# Supplementary material for: Poor Sensitivity of Fecal Gluten Immunogenic Peptides and Serum Antibodies to Detect Duodenal Mucosal Damage in Celiac Disease Monitoring
Source: PubMed Central journal article supplement (PMC7824460; doi:10.3390/nu13010098), 2020-12-30

# Figure S1

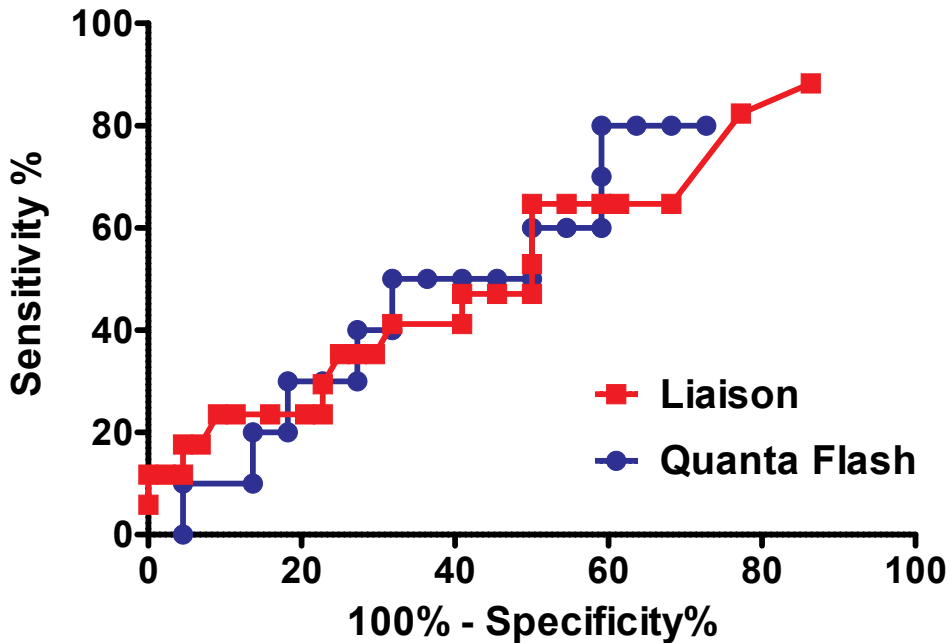

Figure S2

anti-tTG Liaison

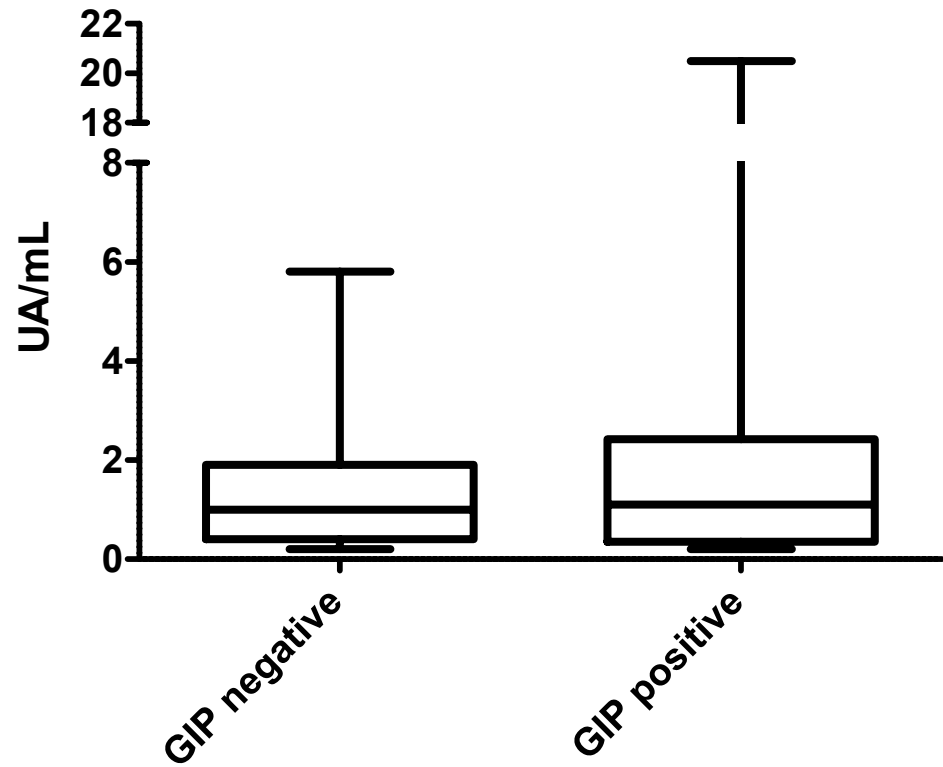

anti-tTG Quanta Flash

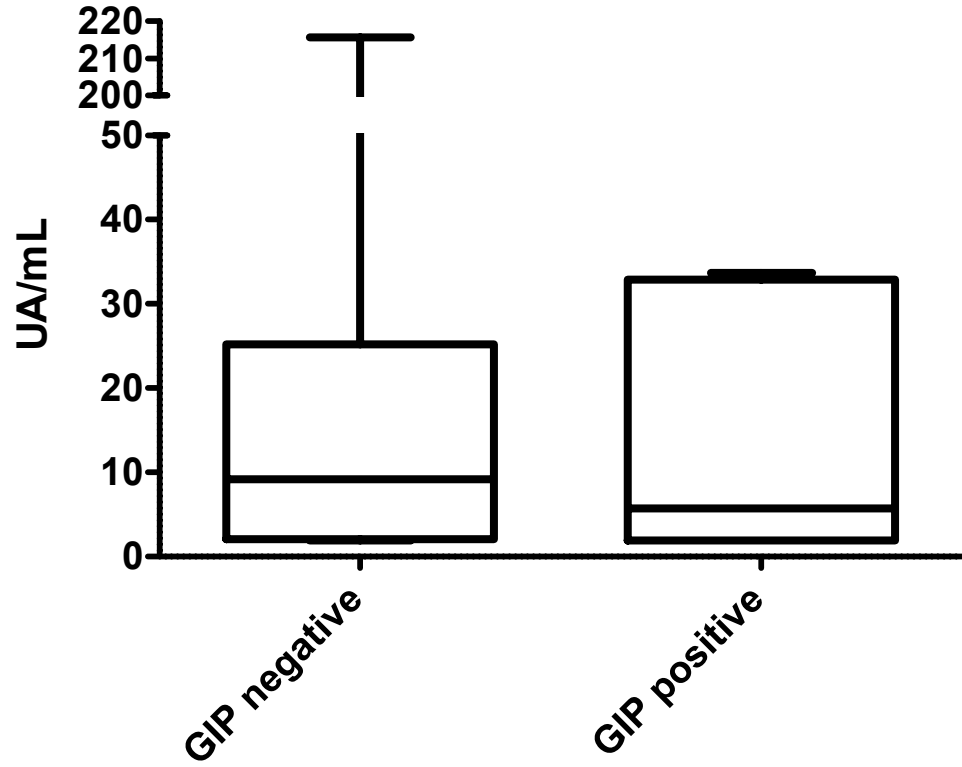

Figure S3

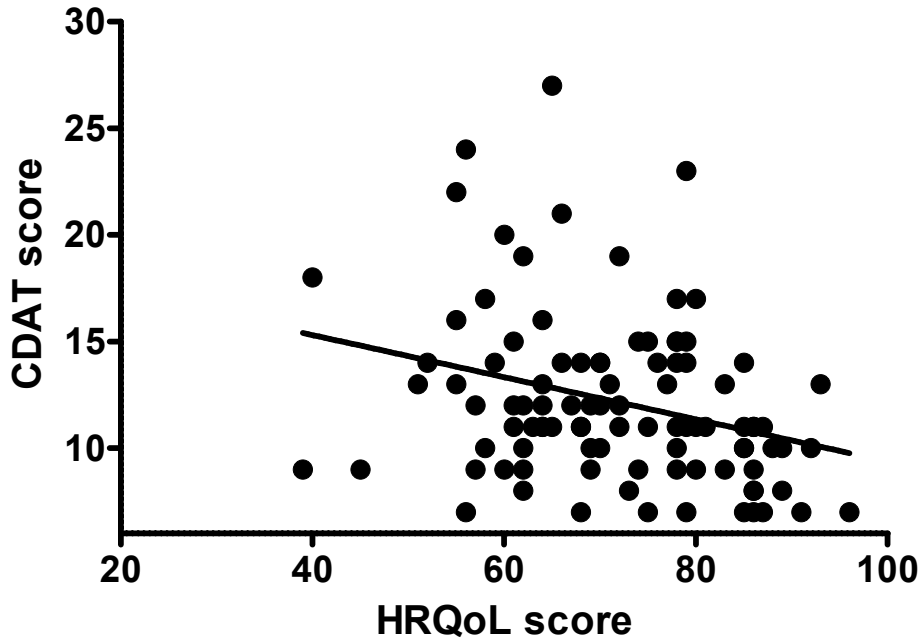

Supplement: nutrients-13-00098-s001.pdf [file nutrients-13-00098-s001.pdf]
